# Supplementary material for: Subjective health complaints in patients with lumbar radicular pain and disc herniation are associated with a sex - OPRM1 A118G polymorphism interaction: a prospective 1-year observational study
Source: PubMed Central journal article supplement (PMC4038376; doi:10.1186/1471-2474-15-161), 2014-05-18
Supplement: 1471-2474-15-161-S1.pdf [file 1471-2474-15-161-S1.pdf]

**Additional file 1**

English version of the Subjective Health Complaints Inventory.

As presented in Eriksen HR, Ihlebaek C, Ursin H. A scoring system for subjective health complaints (SHC). Scand J Public Health. 1999 Mar 1;27(1):63–72.

| Ordinary health problems and complaints last month<br>(circle the correct number) | Not at all | A little | Some | Serious | Number of days |
|-----------------------------------------------------------------------------------|------------|----------|------|---------|----------------|
| 1. Cold, flu                                                                      | 0          | 1        | 2    | 3       | .....          |
| 2. Coughing                                                                       | 0          | 1        | 2    | 3       | .....          |
| 3. Shoulder pain                                                                  | 0          | 1        | 2    | 3       | .....          |
| 4. Neck pain                                                                      | 0          | 1        | 2    | 3       | .....          |
| 5. Upper back pain                                                                | 0          | 1        | 2    | 3       | .....          |
| 6. Arm pain                                                                       | 0          | 1        | 2    | 3       | .....          |
| 7. Headache                                                                       | 0          | 1        | 2    | 3       | .....          |
| 8. Low back pain *                                                                | 0          | 1        | 2    | 3       | .....          |
| 9. Leg pain during physical activity *                                            | 0          | 1        | 2    | 3       | .....          |
| 10. Migraine                                                                      | 0          | 1        | 2    | 3       | .....          |
| 11. Anxiety                                                                       | 0          | 1        | 2    | 3       | .....          |
| 12. Sadness/depression                                                            | 0          | 1        | 2    | 3       | .....          |
| 13. Sleep problems                                                                | 0          | 1        | 2    | 3       | .....          |
| 14. Tiredness                                                                     | 0          | 1        | 2    | 3       | .....          |
| 15. Extra heartbeats                                                              | 0          | 1        | 2    | 3       | .....          |
| 16. Heat flushes                                                                  | 0          | 1        | 2    | 3       | .....          |
| 17. Dizziness                                                                     | 0          | 1        | 2    | 3       | .....          |
| 18. Stomach discomfort                                                            | 0          | 1        | 2    | 3       | .....          |
| 19. Heartburn                                                                     | 0          | 1        | 2    | 3       | .....          |
| 20. Ulcer/non-ulcer dyspepsia                                                     | 0          | 1        | 2    | 3       | .....          |
| 21. Stomach pain                                                                  | 0          | 1        | 2    | 3       | .....          |
| 22. Gas discomfort                                                                | 0          | 1        | 2    | 3       | .....          |
| 23. Diarrhoea                                                                     | 0          | 1        | 2    | 3       | .....          |
| 24. Obstipation                                                                   | 0          | 1        | 2    | 3       | .....          |
| 25. Asthma                                                                        | 0          | 1        | 2    | 3       | .....          |
| 26. Breathing difficulties                                                        | 0          | 1        | 2    | 3       | .....          |
| 27. Allergies                                                                     | 0          | 1        | 2    | 3       | .....          |
| 28. Eczema                                                                        | 0          | 1        | 2    | 3       | .....          |
| 29. Chest pain                                                                    | 0          | 1        | 2    | 3       | .....          |

\* The items 8. *Low back pain* and 9. *Leg pain during physical activity* were excluded in all analyses.
